# Supplementary material for: Scaling of swimming performance in baleen whales
Source: Oxford University Press journal article supplement (doi:10.1242/jeb.204172), 2019-01-01
Supplement: jeb204172supp.pdf [file jeb204172supp.pdf]

Table S1. Tag Deployment Information

[Click here to Download Table S1](#)
